1 **Evolutionary patterns of 64 vertebrate genomes (species) revealed by phylogenomics**  
2 **analysis of protein-coding gene families**

3 Jia Song<sup>1,2#</sup>, Xia Han<sup>1</sup>, Kui Lin<sup>1\*</sup>

4 <sup>1</sup> State Key Laboratory of Earth Surface Processes and Resource Ecology and Ministry of  
5 Education Key Laboratory for Biodiversity Science and Ecological Engineering, College of  
6 Life Sciences, Beijing Normal University, Beijing 100875, China

7 <sup>2</sup> Institute of Molecular Medicine, Renji Hospital, Shanghai Jiao Tong University School of  
8 Medicine, Shanghai, 200127, China

9 \*Corresponding author

10 # present address

11 E-mail:

12 [Kui Lin: linkui@bnu.edu.cn](mailto:linkui@bnu.edu.cn)

13 [Jia Song: songjia2013123@mail.bnu.edu.cn](mailto:songjia2013123@mail.bnu.edu.cn)

14 [Xia Han: hanxia@mail.bnu.edu.cn](mailto:hanxia@mail.bnu.edu.cn)

15

16 **Abstract**

17 **Background:** Recent studies have demonstrated that phylogenomics is an important basis for  
18 answering many fundamental evolutionary questions. With more high-quality whole genome  
19 sequences published, more efficient phylogenomics analysis workflows are required urgently.

20 **Results:** To this end and in order to capture putative differences among evolutionary histories  
21 of gene families and species, we developed a phylogenomics workflow for gene family  
22 classification, gene family tree inference, species tree inference and duplication/loss events  
23 dating. Our analysis framework is on the basis of two guiding ideas: 1) gene trees tend to be  
24 different from species trees but they influence each other in evolution; 2) different gene  
25 families have undergone different evolutionary mechanisms. It has been applied to the  
26 genomic data from 64 vertebrates and 5 out-group species. And the results showed high  
27 accuracy on species tree inference and few false-positives in duplication events dating.

28 **Conclusions:** Based on the inferred gene duplication and loss event, only 9~16% gene  
29 families have duplication retention after a whole genome duplication (WGD) event. A large  
30 part of these families have ohnologs from two or three WGDs. Consistent with the previous  
31 study results, the gene function of these families are mainly involved in nervous system and  
32 signal transduction related biological processes. Specifically, we found that the gene families  
33 with ohnologs from the teleost-specific (TS) WGD are enriched in fat metabolism, this result  
34 implying that the retention of such ohnologs might be associated with the environmental status  
35 of high concentration of oxygen during that period.

36 **Keywords:** Gene family tree; Species tree; Phylogenomics; Vertebrate; Duplication  
37 retention/preservation.

38

## 39 1. Background

40 With the recent advances in next-generation genome sequencing technologies, a large  
41 amount of high-quality genomes covering diverse taxa have been published[1]. The  
42 development and application of efficient and practical computational methods, such as  
43 comparative genomics[2], are very helpful for scientists to use these data to understand the  
44 underlying genetic mechanisms[3]. As one kind of comparative genomics strategies,  
45 phylogenomics[4] was firstly raised by Eisen JA in 1998. At first it had been exclusively  
46 defined as the prediction of protein functions from a phylogenetic view[4]. While in  
47 molecular systematics, phylogenomics is usually used to infer the evolutionary relationship of  
48 species using genome-scale sequencing data[5]. Uniting these two disparate definitions,  
49 phylogenomics is now widely regarded as the molecular phylogenetic analysis of  
50 genome-scale data sets[6], which can be used for predicting gene function[7-10], inferring  
51 evolutionary patterns of macromolecules[11-13], establishing the relationships and  
52 divergence times of genes/species[14, 15], exploring the genome duplications[16-19], and so  
53 on.

54 Phylogenomics data are available in several databases, such as EnsemblCompara[20],  
55 PhylomeDB [21] and Panther[22]. But high-quality phylogenomics data is still indispensable.  
56 On the one hand, these databases are known to contain many errors and uncertainties[23].  
57 Directly using them in orthology detection or genome dynamics study could lead to erroneous  
58 results[24]. The causes of these errors are variable. As far as concerned, these databases  
59 considered little in the following two aspects: 1) the differences in histories of genes and  
60 species because of a hierarchy of evolutionary processes[25]; 2) the different selection stress  
61 on duplication/loss events in different gene families. On the other hand, most of these  
62 databases only contain data from model species, which is a limitation to the new sequenced  
63 genomes. Therefore, we believed an integrative and universal phylogenomics workflow,  
64 which is able to capture more differences among the evolutionary processes of different gene  
65 families and species, is imperative.

66 Here, we constructed a phylogenomics workflow mainly based on OrthoFinder[26],  
67 BEAST[27], Guenomu[28], RAxML[29], Notung[30], IQ-TREE[31] and SiCIE[32] aiming  
68 to include the following two guiding concepts: 1) gene trees tend to be different from species  
69 trees but they influence each other in evolution; 2) different gene families have undergone  
70 different evolutionary mechanisms. In detail, an efficient species tree inference method and a  
71 parameter-learning method were proposed to model the evolutionary differences among

72 different gene families and species trees. Based on protein sequences and CDSs (coding DNA  
73 sequences) from certain species, our workflow was designed to conduct species tree inference  
74 and duplication/loss dating following gene families' classification and gene family tree  
75 inference/modification. As a case study, we applied our workflow to get the gene duplication  
76 history of 64 vertebrates' genomes.

77 Duplications are of great significance as they would affect single gene, a stretch of several  
78 genes, whole chromosomes or even whole genomes and they are considered as the major  
79 driving forces for evolution of genetic novelty[33, 34]. However, many basic features of the  
80 evolution by gene duplication remain unknown[33, 35]. We applied our workflow on the  
81 genomic data of 64 vertebrates and 5 other eukaryotic species from Ensembl v84[36]. A  
82 species tree and 9,767 reconciled gene family trees were obtained. These results were then  
83 used to explore the WGD retention patterns and features, long-term local duplication  
84 preservation events and relative gene functions on vertebrate genomes.

85

## 86 **2. Results and Discussion**

### 87 **2.1 An efficient gene tree–species tree phylogenomics workflow**

#### 88 *2.1.1 Introduction to our phylogenomics workflow*

89 A phylogenomics workflow was constructed for multi-species genome evolutionary  
90 history exploration. As shown in Figure 1, the whole workflow could be divided into four  
91 processes. Under the guidance of the first guiding concept that we have mentioned above, the  
92 initial species tree was inferred based on the posteriors of gene families trees under a bayesian  
93 supertree model, which take both the gene duplication-loss and multispecies coalescent events  
94 into consideration. Meanwhile, inspired by supertree methods, whole genome-wide gene  
95 family trees were then used to revise the initial species tree based on the incongruent clades  
96 between the initial species tree and the available public species tree. In this way, it is able to  
97 efficiently reduce computational complexity by using the available species tree information  
98 and guarantee the accuracy by using genome-wide data. Then under the guidance of our  
99 second guiding concept, the fourth process in our workflow applied a parameter-learning  
100 process, which was designed to conduct gene tree modification and gene duplication/loss  
101 events dating. During the duplication/loss dating process, the parameters (event-costs:  
102 costdup and costloss) setting makes great influences[37]. In the previous studies[11, 20, 21],  
103 event-costs were usually set to the same values for all families. Here, we designed a  
104 parameter-learning process to find out the optimal parameter set for each gene family, which

105 may help to capture the difference of selection pressures on gene duplication/loss in different  
106 gene families.

### 107 *2.1.2 Comparison with other similar works*

108 In order to quantify the accuracy of our phylogenomics workflow, we compared the  
109 inferred species tree with the mammals species tree published by Song *et al.* 2012[38] (Figure  
110 S1 in additional file 1) and compared the inferred reconciled gene family trees with  
111 EnsemblCompara in ancestral genome content metric, ancestral chromosome linearity  
112 metric[24] and duplication consistency score[20]. Here, ancestral genome content metric is  
113 based on the assumption that the ancestral genome content sizes should be close to the extant  
114 genomes. Ancestral chromosome linearity metric assumed that each gene on ancestral  
115 genomes should have zero, one or two neighbors, with a peak at two while genes with three  
116 or more neighbors are the errors from the inferences. And duplication consistency score  
117 measures the intersection of the number of species post duplication over the union. It's based  
118 on the assumption that most duplication should have the gene persisting at least in an equally  
119 likely manner in subsequent lineages[20].

120 Firstly, we compared the inferred final species tree (Figure 2) with Song's mammals tree.  
121 Among the totally 31 shared species, only the tree shrew showed a incongruent evolutionary  
122 location between the two species trees. The correct location of tree shrew along the species  
123 tree is still under controversy[39]. Thus, our final species tree shows high accuracy in the  
124 mammals' clade.

125 Secondly, according to our reconciled gene family trees, there were 50,916 duplication  
126 events occurred in the evolutionary history of 9,767 gene families. For the related 8,514 gene  
127 family trees from EnsemblCompara, there were 132,396 duplications. Then, as shown in  
128 Table 1, ancestral genome size inferred from our results shows closer average size to extant  
129 genomes than EnsemblCompara. As shown in Figure 3A, results from our workflow include  
130 much more ancestral genes with two neighbors and less genes with three or more neighbors  
131 compared with EnsemblCompara. Figure 3B shows clearly that the vast majority of the  
132 duplications from our workflow have a higher duplication consistency score compared with  
133 EnsemblCompara. Above all, EnsemblCompara output much more duplication nodes  
134 compared with our workflow. The vast majority of these duplications from EnsemblCompara  
135 perform worse on the three metrics mentioned above. Furthermore, we inferred another  
136 phylogenomics result by following our workflow but without the reconciliation  
137 parameter-learning in process 4. Results improved a little by the reconciliation

138 parameter-learning according to the three metrics. Actually, the reconciliation  
139 parameter-learning process might have bring in more improvement on accuracy. Because we  
140 can only compare the results based on the 9,767 gene families in our core set while  
141 parameter-learning have already helped us to filter out the gene families which easy to receive  
142 wrong reconciliation results.

### 143 *2.1.3 Limitations and future development*

144 In the species tree inference process, only 527 gene families were used to infer the initial  
145 species tree to avoid costing too much computational time to get the gene family tree  
146 posteriors. Theoretically, most important information reflected by other gene families will be  
147 lost. So we revised the less supported clades on the initial species tree based on genome-wide  
148 gene family trees. However, there are two problems. First, algorithms that can deal with  
149 genome-wide gene families directly are more preferred. Second, there is no available species  
150 tree like the Ensembl species tree at most times.

151 Algorithms able to directly infer the species tree based on all gene families are more  
152 preferred. However, as the representations of the two main categories of such methods,  
153 Phyldog and \*BEAST are not suitable for big scale family data. Firstly, methods as \*BEAST  
154 cannot deal with paralogous genes which are common in gene families. Secondly, Phyldog[40]  
155 is limited by the sample size. Phyldog was designed to co-estimate genes and species trees  
156 under a DL model in a maximum likelihood framework, which get results in a short running  
157 time theoretically. Under our test, however, it was out of memory (our computational  
158 resource: 4T in memory) when we applied Phyldog on all the 11,698 families by default  
159 parameters. Then the family number was reduced to about 130, it can infer a species tree and  
160 130 the gene family trees. From the Phyldog species tree (Figure S2 in additional file 1), we  
161 can see some obvious mistakes. Perhaps, the MSAs of the selected 130 gene families were  
162 not enough to reflect the real relationships of species. We will try to seek or develop an  
163 efficient species tree inference algorithm, which is able to co-estimate gene and species tree  
164 basing on genome-wide gene families for our workflow in the near future. Currently for our  
165 limited computational resources and large-scale data, our workflow may be a good choice. In  
166 addition, there is no available species tree like the Ensembl species tree at most times. To  
167 overcome this, it could be a proper way to choose two or more gene family sets randomly to  
168 get two or more initial species trees and compare the initial trees with each other to get the  
169 incongruent clades (Figure S3 in additional file 1).

170 In addition, read-through genes might also cause problems. A  
171 read-through/conjoined[41-43] gene is formed at the time of transcription by combining at  
172 least part of one exon from each of two or more distinct (parent) genes. In the gene family  
173 classification process, read-through genes/proteins will result in some nesting gene families  
174 including their parents. Such situations have not been considered in most phylogenomics  
175 datasets. In our case study, we seek these nesting gene families (Figure S4 in additional file 1)  
176 based on the read-through genes annotated in the GENCODE annotation file of HUMAN  
177 (V24) [44] and filtered out 454 such families. However, annotations of  
178 read-through/conjoined genes on other genomes are lacking or in low accuracy. It merits  
179 further attention to find a better way to deal with these families.

## 180 **2.2 The features of whole genome duplication on vertebrate evolution**

181 It is now clear that there have been three major WGDs in vertebrate genomes evolutionary  
182 history. Two (named 1R WGD and 2R WGD respectively) occurred near the base of the  
183 vertebrates' evolutionary history and the third (named TS WGD) occurred at the base of the  
184 teleost fishes' evolutionary history [45-49]. Although WGDs are often credited with great  
185 evolutionary importance, the processes governing the retention of ohnologs (paralogs  
186 generated by WGD) and their biological significance remain unclear. In this section, we  
187 explored the patterns of ohnologs retention and the relative function based on our  
188 reconciliation results of 9,767 gene families.

189 We got the gene families with ohnologs retention by seeking the duplications on the  
190 reconciled gene family trees and then mapped these duplications onto the species tree. Similar  
191 with previous studies[50-53], these three WGD-affected ancestral branches show about  
192 9%~16% gene duplication retention (additional file 2, supplementary material) which are  
193 significantly higher than other ancestral branches (P-value = 0.00193, Wilcox test, Table S1  
194 and Figure S5 in additional file 1). Protein-protein interactions (PPIs) are enriched among the  
195 members of these gene families according to the human genes and their PPI data (Table S2 in  
196 additional file 1). This might reflect the gene dosage selection effects[54] after WGDs.  
197 Ohnologs retention from the 2R WGD might have undergone the weakest dosage selection  
198 among these three WGDs. Then based on duplication overlap rates (defined in Materials and  
199 Methods), we found that compared with other branches on the species tree, gene families with  
200 duplication retentions on the three WGD-affected branches are significantly more overlapped  
201 (P-value < 0.05, Fisher exact test). As shown in Figure 4A, 68 gene families retained ohnologs  
202 after all the three WGDs and 588 families after at least two WGDs.

203 According to human gene ontology information, gene families with ohnologs retention  
204 after these three WGDs are mainly involved in development, signaling and gene regulation  
205 (Figure S6 in additional file 1), which are consistent with the previous studies[55-59]. Then  
206 we divided these families into seven classes according to their ohnologs retention pattern after  
207 the three WGDs (Figure 4B). We found the 68 gene families with ohnologs retention after all  
208 of the three WGDs (class 1) are mainly involved in functional categories related to neuron,  
209 axon, signal and cell growth. Class 2 consists of gene families with ohnologs retention after  
210 both the TS and the 1R WGD and class 3 consists of gene families with ohnologs retention  
211 after both the TS and the 2R WGD. These two classes show similar GO enrichment results  
212 and they are both enriched in functional categories related to neuron, axon and cell-junction.  
213 Class 4, which consists of gene families with ohnologs retention after both the 1R and the 2R  
214 WGDs, are mainly involved in signal transduction. Above all, combined with the results from  
215 published studies[60, 61], nervous system and signal transduction related gene families are  
216 highly expanded on all vertebrate genomes through these three WGDs. Combined with the  
217 PPI enrichment results, this retention pattern may be a result of gene dosage selection.

218 The other three classes that consist of gene families with all ohnologs from one WGD are  
219 enriched in different functional categories and might reflect different retention mechanisms.  
220 We found that gene families in class 7 are enriched in fat metabolism. Further, we used the  
221 gene ontology data of zebra fish to redo the GO enrichment analysis, and the results (Figure  
222 4C) showed more GO terms involved in fat metabolism, including anabolism and catabolism.  
223 As is well known, fat releases much more energy than other nutrients such as carbohydrate  
224 and protein in exhaustive oxidation and this process costs much more oxygen at the same  
225 time. More specifically, acyl-CoA and fatty-acyl-CoA, which included in many enriched  
226 biological processes, are essential products in metabolic process with oxygen consumption.  
227 Interestingly, this TS WGD happened at the period that the earth has its highest content of  
228 oxygen level (up to 33%) during the evolutionary history of vertebrates (Figure S7 in  
229 additional file 1). All of these lead to a suggestion that the high content of oxygen might be a  
230 kind of selection to the duplication retention after the TS WGD to promote fat as a main way  
231 to store energy. This might be one reason that fish have more unsaturated fatty and it is worth  
232 more discussion in future works.

### 233 **2.3 The features of local duplications on vertebrate genomes**

234 It should be noticed that many paralogs in current gene families were not originated by  
235 the WGD events mentioned above, but by extensive local duplications[62]. So we also



236 identified the local duplications from our reconciliation results to explore such retention  
237 pattern in vertebrates. We firstly found that there were many more duplications occurred on  
238 the extant species-specific branches than the ancestral ones on the species tree  
239 (Kolmogorov-Smirnov test in R, p-value < 2.2e-16, Table S1 in additional file 1). As previous  
240 studies[63, 64] indicated that three steps are responsible for the generation of preserved gene  
241 duplications: origin through mutation (duplication), a fixation/spreading phase and a  
242 preservation/maintenance phase when the fixed change is maintained. The majority of  
243 duplications on extant species might still be under the fixation/spreading phase. While most  
244 duplications on ancestral genomes might already be under the preservation/maintenance  
245 phase for the most recent ancestral genome on our species tree existed 6.5 million years ago,  
246 which has already exceeded the average half-life of a gene duplication (approximately 4  
247 million years) provided by previous studies[33].

248 Previous studies always focused on the duplication mutation rates and duplication fixation  
249 rates. Different from these studies, we estimated the duplication preservation/maintenance  
250 rates based on the duplications annotated on the ancestral genomes and their origin time (see  
251 Materials and Methods). After removing the duplications resulted from WGDs, we estimated  
252 the duplication preservation rates for 9,581 gene families. 7,075 gene families have no local  
253 duplications on ancestral genomes, which indicated that about 74% gene families in our core  
254 data have no long-term duplication preservation and most gene families kept singleton status  
255 during the evolutionary history of vertebrate genomes. We then got non-zero duplication  
256 preservation/maintenance rates for 2,506 gene families and 95% duplication preservation  
257 rates of these gene families are distributed between 0.0009 and 0.016 (Figure S8 in additional  
258 file 1). According to the gene and GO information from human, the gene families with  
259 long-term local duplications preservation are mainly involved in ion transport and some  
260 important signaling pathways. In addition, we also found that some local gene duplications  
261 might be retained through the natural selection caused by oxygen-level changes (Figure 5).

262

### 263 **3. Conclusions**

264 Based on two guiding concepts, we developed an integrative phylogenomics workflow by  
265 integrating an efficient species tree inference workflow, which adopt advantages from  
266 co-estimation and supertree methods, and a parameter-learning process to account for more  
267 about the relationship and differences among species and gene trees. It was designed for gene  
268 family classification, gene family tree and species tree inference and duplication/loss dating.

269 Then, we analyzed the genomic data of 64 vertebrates and 5 out-groups from Ensembl as a  
270 case study to demonstrate a complete application of our workflow on the accurate inference  
271 of the evolutionary history of genome-wide gene families and species. Based on our  
272 phylogenomics results, we captured evolutionary traces from two different duplication  
273 retention mechanisms. We found that dosage selection might play an important role on  
274 ohnologs retention after WGDs and the changing environmental oxygen content might be a  
275 kind of natural selection affecting paralogs from both WGDs and local duplications. Above  
276 all, we expected that our workflow will facilitate further studies aiming to explore genome  
277 evolutionary histories.

278

## 279 **4. Methods**

### 280 **4.1 Gene family classification**

281 In order to get genomic sequences and annotations with high quality, we used the data of  
282 69 species from Ensembl v84 as a case study to introduce our workflow. We downloaded all  
283 protein sequences and CDS sequences of these species from FTP site of Ensembl  
284 (<http://www.ensembl.org/>, Build 84)[36] and chose their longest protein and CDS to be the  
285 representation for each gene. The too short (shorter than 10aa) and too simple (stop codons  
286 percent greater than 20) genes were filtered out then.

287 Here, OrthoFinder-0.4[26] was used to identify homology relationships between these  
288 sequences. OrthoFinder is a very efficient algorithm, which can overcome gene length bias  
289 and phylogenetic distance problems in gene family classification. After this step, we got  
290 totally 54,808 gene families. We then removed too simple (members from a unique species)  
291 and too complex gene families, which including known read-through genes (according to  
292 gene annotation file (v24) of human in ENCODE[44]) or with more than 1,000 members.  
293 17,025 gene families were left for following analysis (additional file 2)

### 294 **4.2 Gene family tree inference**

295 In this step, protein sequences of gene families were aligned in MAFFT v7[65](--auto)  
296 and then translated into CDS alignments by translatorX[66]. The poorly aligned regions were  
297 removed from these CDS MSAs by trimAl[67]. Here, we removed some gene families with  
298 specific labels in its sequences (such as X) or with very poor alignment quantity (additional  
299 file 2). For the left 14,037 CDS MSAs, we inferred the gene family trees in RAxML  
300 v8.2.9[29] under GTRGAMMI sequence evolution model. For some MSAs including less

301 than four members and some MSAs including too much gaps, we finally only got reliable  
302 phylogenetic trees for 11,698 gene families.

### 303 **4.3 Species tree inference**

304 There are 579 gene families including members from all of the 69 species. We filtered out  
305 the gene families with members' distribution various largely ( $CV > 0.5$ ) on different species to  
306 avoid information asymmetry. So 527 gene families were left for species tree inference.

307 BEAST[27] (parameters: a gamma-distributed model of rate variation with four discrete  
308 categories and an HKY substitution model with a strict clock, 10,000,000 generations,  
309 sampling every 5000 generations) was used to infer the posterior distributions of these 527  
310 gene family trees. The results possessed a good convergence under these parameters setting  
311 (with effective independent sample size greater than 200 for each parameter). Guenomu was  
312 used to infer species tree by considering gene duplication, loss and multispecies coalescent  
313 simultaneously (10,000,000 generations, sampling every 10,000 generations) based on these  
314 tree posteriors. It outputted two species trees and we used the one with 99.9% probability as  
315 the initial species tree.

316 In addition, we downloaded the Ensembl species tree inferred by EnsemblCompara to  
317 find out the possible errors on the initial tree. Firstly, we compared the initial species tree with  
318 Ensembl species tree to find out the incongruent clades. We found seven species (including  
319 ancestral species) bearing different phylogenetic sister-branches between these two trees  
320 (Figure S9 in additional file 1). Secondly, in order to find out the true phylogenetic  
321 sister-branches of these seven species, SiCIE v1.2[32] was used to extract phylogenetic  
322 supports from the 11,698 gene family trees. The results (Table S3 in additional file 1) show  
323 that three clades on initial species tree got significantly higher supports than the respective  
324 clades on the Ensembl species tree. Conversely, other three clades on Ensembl species tree  
325 got significantly higher supports. Unfortunately, the rest incongruence couldn't find a clear  
326 relationship from these 11,698 gene family trees. We then improved the initial species tree by  
327 modifying its three weaker supported incongruent clades. The final species tree is displayed  
328 in Figure 2.

### 329 **4.4 Species/gene trees reconciliation**

330 Inspired by the "Felsenstein equation" [68], we put forward a parameter-learning method  
331 to find out the optimal event-costs for each gene family based on two optimal principles.  
332 Firstly, the modified gene family tree should have largest ML (maximum likelihood) value  
333 based on the corresponding MSA (multiple sequence alignment) of CDS. Secondly, the

334 optimal reconciled results should contain the fewest number of events to explain the  
335 incongruences between the gene family tree and species tree. Then, based on the optimum  
336 event-costs pairs of each gene family, we modified the low supported clades on the gene  
337 family tree and further dated the evolutionary events (duplication and loss) by reconciliation.  
338 In our case study, 11,698 gene family trees were used as inputs. Finally, 9,767 gene families  
339 got uniquely reconciled gene family tree under their optimal event-costs pairs. More details  
340 are described below.

341 We used Notung v2.8.1.7, IQ-TREE v1.5.2 and our parameter-learning scripts to finish  
342 species/gene trees parameter-learning and reconciliation. After the event-costs pairs (costdup  
343 and costloss) assignment, Notung is able to modify the gene family tree and date gene  
344 duplications/losses under a DL model in a parsimony strategy. In order to seek the optimal  
345 event-costs pairs set for each gene family, 15 event-costs pairs (costdup, costloss) with  
346 different cost ratios (costdup/costloss) were used to parameter-learning and reconciliation in a  
347 cycle process (Figure 1). The detailed steps are described as follow:

348 Step 1. Rearrange the gene family tree: the gene family tree was rearranged under the  
349 ‘Rearrange mode’ of Notung. We rearranged the weakly supported regions (edges with  
350 bootstrap less than 50) in the gene family tree to produce alternate gene family trees with  
351 minimum DL score based on the current event-costs pair. Here, at most 100 eligible  
352 alternate gene trees will be outputted. IQ-TREE was then used to pick out the most  
353 optimal one with maximal maximum likelihood based on the respective CDS MSA.

354 Step 2. Root the gene family tree: the gene family tree was rooted under the ‘Rooting  
355 mode’ of Notung by minimizing DL score based on current event-costs pair.

356 Step 3. Reconcile the species/gene tree: duplication/loss events were assigned on the  
357 gene family tree under the ‘Reconcile mode’ of Notung by minimizing DL scores based  
358 on current event-costs pair. Then current event-costs pair was set to the next pair and the  
359 analysis jumped to step 1 if the current event-costs pair wasn’t the last one. Otherwise,  
360 analysis jumped to step 4.

361 Step 4. Construct the optimal event-costs pairs set for each gene family: we used  
362 IQ-TREE to calculate the ML (maximum likelihood) for each resulted gene family tree,  
363 which was inferred under different event-costs pairs. In this way, we obtained the  
364 optimal event-costs pairs set I, which consists of event-costs pairs resulting in maximal  
365 ML trees. Meanwhile, we constructed the optimal event-costs pairs set II, which consists  
366 of event-costs pairs resulting in minimal DL events in the reconciled results. The

367 intersection of optimal event-costs pairs set I and II was considered as optimal  
368 event-costs pairs III. The final optimal set for the family was empty if the optimal  
369 event-costs pairs set III contains more than one member and the reconciled results are  
370 inconsistent under members. Otherwise, the final optimal event-costs pairs set is the  
371 optimal event-costs pairs set III.

372 In our analysis, we totally used 15 (costdup, costloss) pairs (additional file 2). Finally, we  
373 obtained optimal reconciliation results for 9,767 gene families, which called core gene  
374 families in this study.

#### 375 **4.5 Comparison to EnsemblCompara**

376 We downloaded the gene family trees inferred by EnsemblCompara from its FTP site. For  
377 our workflow integrated gene family classification, our gene families are not consistent with  
378 Ensembl's. Here we selected 8,514 Ensembl gene families with more than four gene members  
379 and overlapped with the 9,767 gene families in our core results to do the comparison.

380 Based on the gene adjacencies extracted from annotation files of the 69 extant species,  
381 DeCo[69] was used to infer the ancestral genome contents and ancestral gene adjacencies  
382 according to our gene trees and Ensembl gene trees, respectively. Then, we calculated the  
383 duplication consistency score[20] for each duplication on these two gene tree sets.

*Duplication consistency score*

$$= \frac{\textit{The species intersection between the left and right sub - trees}}{\textit{The species union between the left and right sub - trees}}$$

#### 384 **4.6 Others**

##### 385 *4.6.1 PPI and GO enrichment analysis*

386 We used protein-linked information from STRING (v10.5) to finish the PPI enrichment  
387 analysis. We firstly abstracted the human protein-protein interaction network with combined  
388 score greater than 700. Then we abstracted the sub-network, whose nodes consisting of genes  
389 in our core gene families and edges linking members from different gene families. We found  
390 that there were 118,028 edges out of 68,641,957 gene pairs from different gene families on  
391 this sub-network. Then, we counted edges and such gene pairs among different  
392 WGD-affected gene family classes. As Table S2 (additional file 1), we found the PPIs were  
393 enriched in these classes (Fisher exact test).

394 The GO (gene ontology) enrichment analysis in this study was conducted by R package  
395 named 'clusterProfiler'[70] basing on annotation data from 'org.Hs.eg.db' and 'org.Dr.eg.db'.

##### 396 *4.6.2 Local duplication preservation rate*

397 The local duplication preservation rates were inferred based on the gene duplications on  
398 ancestral genomes and their origin time. Firstly, in order to get the approximate existing time  
399 of each ancestors on the species tree, we downloaded the dated species tree (Figure S7 in  
400 additional file 1) for the 69 species from TIMETREE ([www.timetree.org](http://www.timetree.org))[71] and use its time  
401 information to date our species tree. We dated the ancestral nodes with consistent sub-trees  
402 between these two trees. In this way, we got approximate existing time for ancestral nodes  
403 where 20 or more families originated. Finally, we dated 23 such ancestral nodes and got the  
404 origin time of 9,581 (total: 9,767) gene families.

*Gene family duplication preservation rate*

$$= \frac{\text{The number of duplications happened on the ancestral genomes}}{\text{The approximate origin time of this family}}$$

405 *4.6.3 Duplication overlap between two branches on species tree*

406 For each ancestral branch, we got a gene family set consisting of gene families expanded  
407 at this branch, and we labeled this set as  $D_i$ . In this work, we defined a measure named  
408 ‘duplication overlap’ to describe the overlap rate of expanded gene families between two  
409 branches on the species tree.

$$\text{Duplication overlap between branch a and b} = \text{Intersection}(a, b) = \frac{D_a \cap D_b}{D_a \cup D_b}$$

410

#### 411 **List of abbreviations**

412 WGD: Whole Genome Duplication

413 TS: Teleost-Specific

414 DL: Duplication-Loss

415 PPI: Protein-Protein Interaction

416 GO: Gene Ontology

417 CDS: Sequence coding for amino acids in protein

418 MSA: multiple sequence alignment

419 CV Coefficient of Variance

420 ML maximum likelihood

#### 421 **Declarations**

422 **Ethics approval and consent to participate**

423 Not applicable.

424 **Consent for publication**

425 Not applicable.

#### 426 **Acknowledgements**

427 We thank HaiLing Fang and Bing Liu for their assistance in data preparation and figure  
428 modification.

#### 429 **Authors' contributions**

430 KL conceived of this project and improved the manuscript. JS designed the experiment,  
431 performed the analysis and wrote the manuscript. XH downloaded the data and performed  
432 some analysis. All authors read and approved the final manuscript.

#### 433 **Competing interests**

434 The authors have declared no competing interests.

#### 435 **Funding**

436 This work was supported by the State Key Basic Research and Development Plan  
437 (2017YFA0605104) and a project of the State Key Laboratory of Earth Surface Processes and  
438 Resource Ecology.

#### 439 **Availability of data and materials**

440 Data in the study and parameter-learning related scripts are freely available via the website  
441 <http://cmb.bnu.edu.cn/69vertebrates/>.

442

#### 443 **References**

- 444 1. Pagani I, Liolios K, Jansson J, Chen IMA, Smirnova T, Nosrat B, Markowitz  
445 VM, Kyrpides NC: **The Genomes OnLine Database (GOLD) v.4: status of  
446 genomic and metagenomic projects and their associated metadata.**  
447 *Nucleic Acids Research* 2012, **40**(D1):D571-D579.
- 448 2. Hardison RC: **Comparative genomics.** *Plos Biology* 2003, **1**(2):156-160.
- 449 3. Bundalovic-Torma C, Parkinson J: **Comparative Genomics and  
450 Evolutionary Modularity of Prokaryotes.** *Advances in Experimental  
451 Medicine and Biology* 2015, **883**:77-96.
- 452 4. Eisen JA: **Phylogenomics: Improving functional predictions for  
453 uncharacterized genes by evolutionary analysis.** *Genome Research*  
454 1998, **8**(3):163-167.
- 455 5. Delsuc F, Brinkmann H, Philippe H: **Phylogenomics and the  
456 reconstruction of the tree of life.** *Nature Reviews Genetics* 2005,  
457 **6**(5):361-375.

- 458 6. Kumar S, Filipinski AJ, Battistuzzi FU, Pond SLK, Tamura K: **Statistics and**  
459 **Truth in Phylogenomics.** *Molecular Biology and Evolution* 2012,  
460 **29(2):457-472.**
- 461 7. Mi H, Muruganujan A, Casagrande JT, Thomas PD: **Large-scale gene**  
462 **function analysis with the PANTHER classification system.** *Nature*  
463 *Protocols* 2013, **8(8):1551-1566.**
- 464 8. Fang G, Bhardwaj N, Robilotto R, Gerstein MB: **Getting Started in Gene**  
465 **Orthology and Functional Analysis.** *Plos Computational Biology* 2010,  
466 **6(3).**
- 467 9. Lee DA, Rentzsch R, Orengo C: **GeMMA: functional subfamily**  
468 **classification within superfamilies of predicted protein structural**  
469 **domains.** *Nucleic Acids Research* 2010, **38(3):720-737.**
- 470 10. Rappoport N, Karsenty S, Stern A, Linial N, Linial M: **ProtoNet 6.0:**  
471 **organizing 10 million protein sequences in a compact hierarchical**  
472 **family tree.** *Nucleic Acids Research* 2012, **40(D1):D313-D320.**
- 473 11. Li Z, Defoort J, Tasdighian S, Maere S, Van de Peer Y, De Smet R: **Gene**  
474 **Duplicability of Core Genes Is Highly Consistent across All**  
475 **Angiosperms.** *Plant Cell* 2016, **28(2):326-344.**
- 476 12. Morel G, Sterck L, Swennen D, Marcet-Houben M, Onesime D, Levasseur A,  
477 Jacques N, Mallet S, Couloux A, Labadie K *et al*: **Differential gene**  
478 **retention as an evolutionary mechanism to generate biodiversity**  
479 **and adaptation in yeasts (vol 5, 11571, 2015).** *Scientific Reports* 2015,  
480 **5.**
- 481 13. Blomme T, Vandepoele K, De Bodt S, Simillion C, Maere S, Van de Peer Y:  
482 **The gain and loss of genes during 600 million years of vertebrate**  
483 **evolution.** *Genome Biology* 2006, **7(5):R43.**
- 484 14. Jarvis ED, Mirarab S, Aberer AJ, Li B, Houde P, Li C, Ho SYW, Faircloth BC,  
485 Nabholz B, Howard JT *et al*: **Whole-genome analyses resolve early**  
486 **branches in the tree of life of modern birds.** *Science* 2014,  
487 **346(6215):1320-1331.**
- 488 15. Capella-Gutierrez S, Marcet-Houben M, Gabaldon T: **Phylogenomics**  
489 **supports microsporidia as the earliest diverging clade of sequenced**  
490 **fungi.** *BMC Biology* 2012, **10(1):47.**



- 491 16. Ascencio D, Ochoa S, Delaye L, DeLuna A: **Increased rates of protein**  
492 **evolution and asymmetric deceleration after the whole-genome**  
493 **duplication in yeasts.** *BMC Evolutionary Biology* 2017, **17**(1):40.
- 494 17. Marcet-Houben M, Gabaldon T: **Beyond the Whole-Genome Duplication:**  
495 **Phylogenetic Evidence for an Ancient Interspecies Hybridization in**  
496 **the Baker's Yeast Lineage.** *Plos Biology* 2015, **13**(8).
- 497 18. Ambreen S, Khalil F, Abbasi AA: **Integrating large-scale phylogenetic**  
498 **datasets to dissect the ancient evolutionary history of vertebrate**  
499 **genome.** *Molecular Phylogenetics and Evolution* 2014, **78**:1-13.
- 500 19. Jiao Y, Wickett NJ, Ayyampalayam S, Chanderbali AS, Landherr L, Ralph PE,  
501 Tomsho LP, Hu Y, Liang H, Soltis PS *et al*: **Ancestral polyploidy in seed**  
502 **plants and angiosperms.** *Nature* 2011, **473**(7345):97-U113.
- 503 20. Vilella AJ, Severin J, Ureta-Vidal A, Heng L, Durbin R, Birney E:  
504 **EnsemblCompara GeneTrees: Complete, duplication-aware**  
505 **phylogenetic trees in vertebrates.** *Genome Research* 2009,  
506 **19**(2):327-335.
- 507 21. Huerta-Cepas J, Capella-Gutierrez S, Pryszcz LP, Marcet-Houben M,  
508 Gabaldon T: **PhylomeDB v4: zooming into the plurality of**  
509 **evolutionary histories of a genome.** *Nucleic Acids Research* 2014,  
510 **42**(D1):D897-D902.
- 511 22. Mi H, Huang X, Muruganujan A, Tang H, Mills C, Kang D, Thomas PD:  
512 **PANTHER version 11: expanded annotation data from Gene Ontology**  
513 **and Reactome pathways, and data analysis tool enhancements.**  
514 *Nucleic Acids Research* 2017, **45**(D1):D183-D189.
- 515 23. Boeckmann B, Robinson-Rechavi M, Xenarios I, Dessimoz C: **Conceptual**  
516 **framework and pilot study to benchmark phylogenomic databases**  
517 **based on reference gene trees.** *Briefings in Bioinformatics* 2011,  
518 **12**(5):423-435.
- 519 24. Noutahi E, Semeria M, Lafond M, Seguin J, Boussau B, Gueguen L,  
520 El-Mabrouk N, Tannier E: **Efficient Gene Tree Correction Guided by**  
521 **Genome Evolution.** *Plos One* 2016, **11**(8):e0159559.
- 522 25. Szoellosi GJ, Tannier E, Daubin V, Boussau B: **The Inference of Gene**  
523 **Trees with Species Trees.** *Systematic Biology* 2015, **64**(1):E42-E62.

- 524 26. Emms DM, Kelly S: **OrthoFinder: solving fundamental biases in whole**  
525 **genome comparisons dramatically improves orthogroup inference**  
526 **accuracy.** *Genome Biology* 2015, **16**:157.
- 527 27. Bouckaert R, Heled J, Kuehnert D, Vaughan T, Wu C-H, Xie D, Suchard MA,  
528 Rambaut A, Drummond AJ: **BEAST 2: A Software Platform for Bayesian**  
529 **Evolutionary Analysis.** *Plos Computational Biology* 2014,  
530 **10(4)**:e1003537.
- 531 28. De Oliveira Martins L, Mallo D, Posada D: **A Bayesian Supertree Model**  
532 **for Genome-Wide Species Tree Reconstruction.** *Systematic Biology*  
533 2016, **65(3)**:397-416.
- 534 29. Stamatakis A: **RAXML version 8: a tool for phylogenetic analysis and**  
535 **post-analysis of large phylogenies.** *Bioinformatics* 2014,  
536 **30(9)**:1312-1313.
- 537 30. Chen K, Durand D, Farach-Colton M: **NOTUNG: A program for dating**  
538 **gene duplications and optimizing gene family trees.** *Journal of*  
539 *Computational Biology* 2000, **7(3-4)**:429-447.
- 540 31. Lam-Tung N, Schmidt HA, von Haeseler A, Bui Quang M: **IQ-TREE: A Fast**  
541 **and Effective Stochastic Algorithm for Estimating**  
542 **Maximum-Likelihood Phylogenies.** *Molecular Biology and Evolution*  
543 2015, **32(1)**:268-274.
- 544 32. DeBlasio DF, Wisecaver JH: **SICLE: a high-throughput tool for extracting**  
545 **evolutionary relationships from phylogenetic trees.** *Peerj* 2016,  
546 **4**:e2359.
- 547 33. Lynch M, Conery JS: **The evolutionary fate and consequences of**  
548 **duplicate genes.** *Science* 2000, **290(5494)**:1151-1155.
- 549 34. S O: **Evolution by Gene Duplication.** *Springer-Verlag* 1970.
- 550 35. Kondrashov FA, Kondrashov AS: **Role of selection in fixation of gene**  
551 **duplications.** *Journal of Theoretical Biology* 2006, **239(2)**:141-151.
- 552 36. Yates A, Akanni W, Amode MR, Barrell D, Billis K, Carvalho-Silva D,  
553 Cummins C, Clapham P, Fitzgerald S, Gil L *et al*: **Ensembl 2016.** *Nucleic*  
554 *Acids Research* 2016, **44(D1)**:D710-D716.
- 555 37. Bansal MS, Alm EJ, Kellis M: **Reconciliation Revisited: Handling**  
556 **Multiple Optima when Reconciling with Duplication, Transfer, and**

- 557           **Loss.** *Journal of Computational Biology* 2013, **20**(10):738-754.
- 558   38.   Song S, Liu L, Edwards SV, Wu S: **Resolving conflict in eutherian**  
559           **mammal phylogeny using phylogenomics and the multispecies**  
560           **coalescent model (vol 109, pg 14942, 2012).** *Proceedings of the*  
561           *National Academy of Sciences of the United States of America* 2015,  
562           **112**(44):E6079-E6079.
- 563   39.   Foley NM, Springer MS, Teeling EC: **Mammal madness: is the mammal**  
564           **tree of life not yet resolved?** *Philosophical Transactions of the Royal*  
565           *Society B-Biological Sciences* 2016, **371**(1699):pii: 20150140.
- 566   40.   Boussau B, Szoellosi GJ, Duret L, Gouy M, Tannier E, Daubin V:  
567           **Genome-scale coestimation of species and gene trees.** *Genome*  
568           *Research* 2013, **23**(2):323-330.
- 569   41.   Roginski RS, Raj BKM, Birditt B, Rowen L: **The human GRINL1A gene**  
570           **defines a complex transcription unit, an unusual form of gene**  
571           **organization in eukaryotes.** *Genomics* 2004, **84**(2):265-276.
- 572   42.   Denoëud F, Kapranov P, Ucla C, Frankish A, Castelo R, Drenkow J, Lagarde J,  
573           Alioto T, Manzano C, Chrast J *et al*: **Prominent use of distal 5 '**  
574           **transcription start sites and discovery of a large number of**  
575           **additional exons in ENCODE regions.** *Genome Research* 2007,  
576           **17**(6):746-759.
- 577   43.   Akiva P, Toporik A, Edelheit S, Peretz Y, Diber A, Shemesh R, Novik A, Sorek  
578           R: **Transcription-mediated gene fusion in the human genome.** *Genome*  
579           *Research* 2006, **16**(1):30-36.
- 580   44.   Harrow J, Frankish A, Gonzalez JM, Tapanari E, Diekhans M, Kokocinski F,  
581           Aken BL, Barrell D, Zadissa A, Searle S *et al*: **GENCODE: The reference**  
582           **human genome annotation for The ENCODE Project.** *Genome Research*  
583           2012, **22**(9):1760-1774.
- 584   45.   Fuerst R: **EVOLUTION BY GENE DUPLICATION - OHNO,S.** *Social Biology*  
585           1972, **19**(1):89-90.
- 586   46.   Dehal P, Boore JL: **Two rounds of whole genome duplication in the**  
587           **ancestral vertebrate.** *Plos Biology* 2005, **3**(10):1700-1708.
- 588   47.   Panopoulou G, Poustka AJ: **Timing and mechanism of ancient**  
589           **vertebrate genome duplications - the adventure of a hypothesis.**

- 590 *Trends in Genetics* 2005, **21**(10):559-567.
- 591 48. Vandepoele K, De Vos W, Taylor JS, Meyer A, Van de Peer Y: **Major events**  
592 **in the genome evolution of vertebrates: Paraneome age and size differ**  
593 **considerably between ray-finned fishes and land vertebrates.**  
594 *Proceedings of the National Academy of Sciences of the United States of*  
595 *America* 2004, **101**(6):1638-1643.
- 596 49. Pasquier J, Cabau C, Thaovi N, Jouanno E, Severac D, Braasch I, Journot L,  
597 Pontarotti P, Klopp C, Postlethwait JH *et al*: **Gene evolution and gene**  
598 **expression after whole genome duplication in fish: the PhyloFish**  
599 **database.** *Bmc Genomics* 2016, **17**.
- 600 50. Smith JJ, Keinath MC: **The sea lamprey meiotic map improves**  
601 **resolution of ancient vertebrate genome duplications.** *Genome*  
602 *Research* 2015, **25**(8):1081-1090.
- 603 51. Brunet FG, Crollius HR, Paris M, Aury J-M, Gibert P, Jaillon O, Laudet V,  
604 Robinson-Rechavi M: **Gene loss and evolutionary rates following**  
605 **whole-genome duplication in teleost fishes.** *Molecular Biology and*  
606 *Evolution* 2006, **23**(9):1808-1816.
- 607 52. Nakatani Y, Takeda H, Kohara Y, Morishita S: **Reconstruction of the**  
608 **vertebrate ancestral genome reveals dynamic genome**  
609 **reorganization in early vertebrates.** *Genome Research* 2007,  
610 **17**(9):1254-1265.
- 611 53. Putnam NH, Butts T, Ferrier DEK, Furlong RF, Hellsten U, Kawashima T,  
612 Robinson-Rechavi M, Shoguchi E, Terry A, Yu J-K *et al*: **The amphioxus**  
613 **genome and the evolution of the chordate karyotype.** *Nature* 2008,  
614 **453**(7198):1064-U1063.
- 615 54. Saitou N, Nei M: **THE NEIGHBOR-JOINING METHOD - A NEW METHOD**  
616 **FOR RECONSTRUCTING PHYLOGENETIC TREES.** *Molecular Biology and*  
617 *Evolution* 1987, **4**(4):406-425.
- 618 55. Makino T, McLysaght A: **Ohnologs in the human genome are dosage**  
619 **balanced and frequently associated with disease.** *Proceedings of the*  
620 *National Academy of Sciences of the United States of America* 2010,  
621 **107**(20):9270-9274.
- 622 56. Maere S, De Bodt S, Raes J, Casneuf T, Van Montagu M, Kuiper M, Van de

- 623 Peer Y: **Modeling gene and genome duplications in eukaryotes.**  
624 *Proceedings of the National Academy of Sciences of the United States of*  
625 *America* 2005, **102**(15):5454-5459.
- 626 57. Blomme T, Vandepoele K, De Bodt S, Simillion C, Maere S, Van de Peer Y:  
627 **The gain and loss of genes during 600 million years of vertebrate**  
628 **evolution.** *Genome Biology* 2006, **7**(5).
- 629 58. Freeling M, Thomas BC: **Gene-balanced duplications, like tetraploidy,**  
630 **provide predictable drive to increase morphological complexity.**  
631 *Genome Research* 2006, **16**(7):805-814.
- 632 59. Semon M, Wolfe KH: **Consequences of genome duplication.** *Current*  
633 *Opinion in Genetics & Development* 2007, **17**(6):505-512.
- 634 60. Holland LZ: **Evolution of new characters after whole genome**  
635 **duplications: Insights from amphioxus.** *Seminars in Cell &*  
636 *Developmental Biology* 2013, **24**(2):101-109.
- 637 61. Roux J, Liu J, Robinson-Rechavi M: **Selective Constraints on Coding**  
638 **Sequences of Nervous System Genes Are a Major Determinant of**  
639 **Duplicate Gene Retention in Vertebrates.** *Molecular Biology and*  
640 *Evolution* 2017, **34**(11):2773-2791.
- 641 62. Canestro C, Albalat R, Irimia M, Garcia-Fernandez J: **Impact of gene**  
642 **gains, losses and duplication modes on the origin and diversification**  
643 **of vertebrates.** *Seminars in Cell & Developmental Biology* 2013,  
644 **24**(2):83-94.
- 645 63. Innan H, Kondrashov F: **The evolution of gene duplications: classifying**  
646 **and distinguishing between models.** *Nature Reviews Genetics* 2010,  
647 **11**(2):97-108.
- 648 64. Levasseur A, Pontarotti P: **The role of duplications in the evolution of**  
649 **genomes highlights the need for evolutionary-based approaches in**  
650 **comparative genomics.** *Biology Direct* 2011, **6**(1):11.
- 651 65. Katoh K, Standley DM: **MAFFT Multiple Sequence Alignment Software**  
652 **Version 7: Improvements in Performance and Usability.** *Molecular*  
653 *Biology and Evolution* 2013, **30**(4):772-780.
- 654 66. Abascal F, Zardoya R, Telford MJ: **TranslatorX: multiple alignment of**  
655 **nucleotide sequences guided by amino acid translations.** *Nucleic Acids*

- 656            *Research* 2010, **38**:W7-W13.
- 657    67.    Capella-Gutierrez S, Silla-Martinez JM, Gabaldon T: **trimAl: a tool for**  
658            **automated alignment trimming in large-scale phylogenetic analyses.**  
659            *Bioinformatics* 2009, **25**(15):1972-1973.
- 660    68.    Felsenstein J: **PHYLOGENIES FROM MOLECULAR SEQUENCES -**  
661            **INFERENCE AND RELIABILITY.** *Annual Review of Genetics* 1988,  
662            **22**:521-565.
- 663    69.    Berard S, Gallien C, Boussau B, Szollosi GJ, Daubin V, Tannier E: **Evolution**  
664            **of gene neighborhoods within reconciled phylogenies.** *Bioinformatics*  
665            2012, **28**(18):I382-I388.
- 666    70.    Yu G, Wang L-G, Han Y, He Q-Y: **clusterProfiler: an R Package for**  
667            **Comparing Biological Themes Among Gene Clusters.** *Omics-a Journal*  
668            *of Integrative Biology* 2012, **16**(5):284-287.
- 669    71.    Hedges SB, Marin J, Suleski M, Paymer M, Kumar S: **Tree of Life Reveals**  
670            **Clock-Like Speciation and Diversification.** *Molecular Biology and*  
671            *Evolution* 2015, **32**(4):835-845.
- 672

673 **Figure Legends**

674 **Figure 1 Flowchart illustrating our workflow**

675 Our workflow mainly consists of four processes. The third and forth are the most important  
676 processes in our workflow. The inputs are displayed in green rectangles. The intermediate  
677 results are displayed in red rectangles while the final results are displayed in blue rectangles.  
678 The software, operation and some parameters used in this workflow are marked on the arrows  
679 in grey, blue and black font respectively.

680 **Figure 2 Final species tree**

681 The common names of species are displayed in parentheses following the Latin names. And  
682 the common name of the common species between this species tree and the mammals species  
683 tree published by Song *et al.* 2012[38] are in blue font.

684 **Figure 3 Comparison between our workflow and EnsemblCompara**

685 ‘our workflow 1’ represents the standard workflow we have described in Materials and  
686 Methods section and ‘our workflow 2’ represents the same workflow but without  
687 parameter-learning in duplication/loss dating. **a.** Ancestral chromosome linearity metric.  
688 Extant 1 represents the genes neighborhoods status on extant genomes based on our 9,767  
689 core gene families. Extant 2 represents the genes neighborhoods status on extant genomes  
690 based on Ensembl 8,514 gene families. The rest three represent the genes neighborhoods  
691 status on ancestral genomes inferred from different phylogenomics results. **b.** Duplication  
692 consistency score.

693 **Figure 4 WGD-affected gene family classes and related gene function**

694 **a.** Intersection among the three WGDs. Gene families with ohnologs retention are highly  
695 overlapped among the tree WGDs. We divided these ohnologs retention gene families into  
696 seven classes. 1R represents the first round WGD occurred on vertebrate genomes. 2R  
697 represents the second round WGD occurred on vertebrate genomes. TS represents the teleost  
698 fish specific WGD. **b.** Enriched functional categories comparison among the seven classes.  
699 The ‘A^B’ represents the intersection of ‘A’ and ‘B’. **c.** The biological processes enrichment  
700 results of class 7 which consist of gene families with ohnologs retention after TS WGD only.  
701 This analysis conducted based on gene ontology data of zebra fish.

702 **Figure 5 GO enrichment results of gene families with long-term local duplications**  
703 **retention**

704 The oxygen levels response related biological processes are labeled in red font.

705 **Tables**

706 **Table 1 Average genome sizes comparison**

| Pipelines                 | Ancestral Genomes <sup>c</sup> | Extant Genomes <sup>d</sup> | Ancestral/extant Ratio <sup>e</sup> |
|---------------------------|--------------------------------|-----------------------------|-------------------------------------|
| Our pipeline <sup>a</sup> | 10290.25                       | 9994.07                     | 1.03                                |
| Our pipeline <sup>b</sup> | 10457.22                       | 9994.07                     | 1.05                                |
| EnsemblCompara            | 22389.23529                    | 13329.38                    | 1.68                                |

707 <sup>a</sup>Our standard workflow according to the processes as we described in Materials and Methods.

708 <sup>b</sup>Insteading of the optimal parameters with default parameters (1.5,1) when reconciliation by

709 Notung in our workflow.

710 <sup>c</sup>Average ancestral genomes size according to our core data/Ensembl 8,514 gene families.

711 <sup>d</sup>Average extant genomes size according to our core data/Ensembl 8,514 gene families.

712 <sup>e</sup>Ratio of average ancestral genomes size and average extant genomes size.

713 **Supplementary materials**

714 additional file 1: supplemental figures and tables.

715 additional file 2: supplemental methods and materials.

716

717



## Gene families identification

All protein and CDS sequences from 69 species

One protein sequence as representation for each gene

orthomclFilterFasta + OrthoFinder

54,808 gene families

## Gene trees inference

11,698 gene trees

RAxML

11,698 MSAs (CDS)

TranslatorX

11,698 MSAs (protein)

Mafft + trimAl

11,698 gene families

Selected

Selected

## Species tree inference

Revised species tree

SICIE

Incongruent relationship set

Species tree 1

Guenomu

Posterior distributions of 527 random selected gene family trees

Mafft + trimAl + TranslatorX + BEAST

Exist Information of species relationship: Species tree 2

## Gene family tree correction in duplication/loss events dating

The gene tree for each gene family + the species tree + a parameter pair (costdup, costloss)

15 parameters (costdup, costloss) pairs

Notung (rearrange)

Gene trees with minimum reconcile scores

iqtree

The gene tree with maximal likelihood based on CDS MSA

Notung (root)

Rooted Gene tree

Notung (reconcile)

Reconciled gene trees

The optimum event-costs pairs  
The consistent gene family tree and duplication/loss events annotation

The corrected gene trees with maximal likelihood based on CDS MSA

iqtree

The corrected gene trees with minimum reconcile events

15 reconciled gene trees

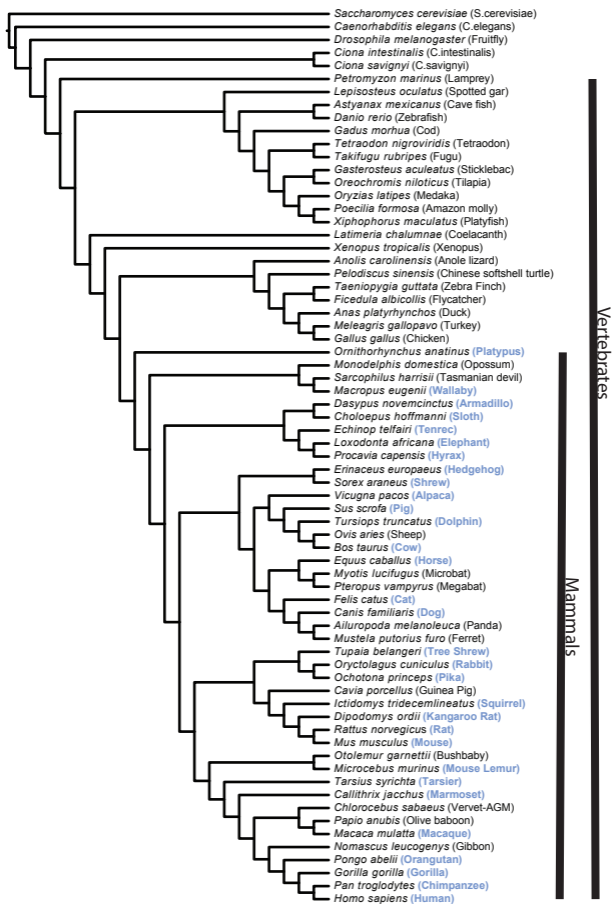

A)

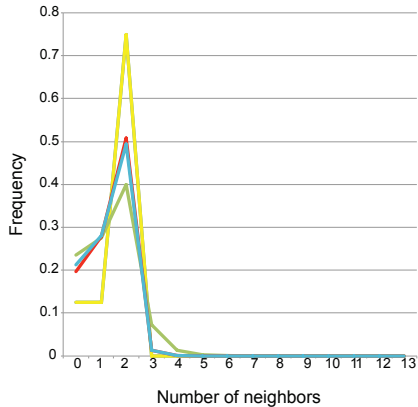

— Extant 1  
— Extant 2  
— Ensembl Compara  
— Our workflow 1  
— Our workflow 2

B)

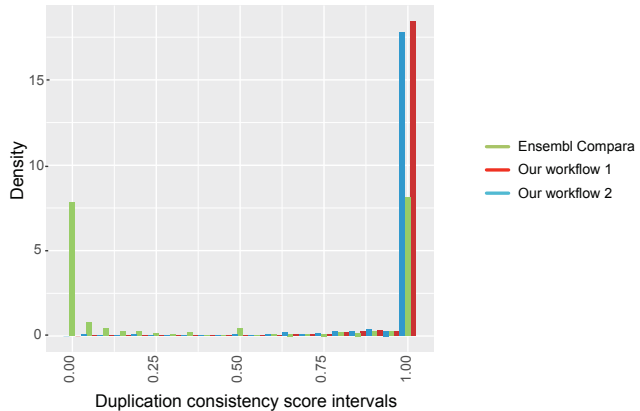

— Ensembl Compara  
— Our workflow 1  
— Our workflow 2

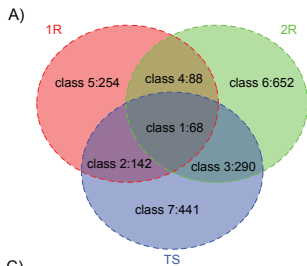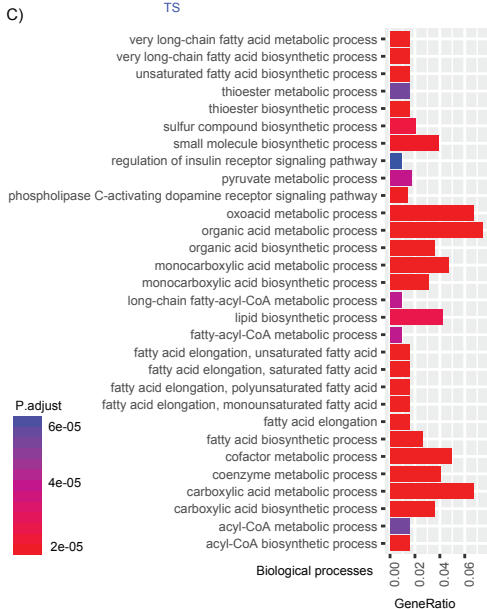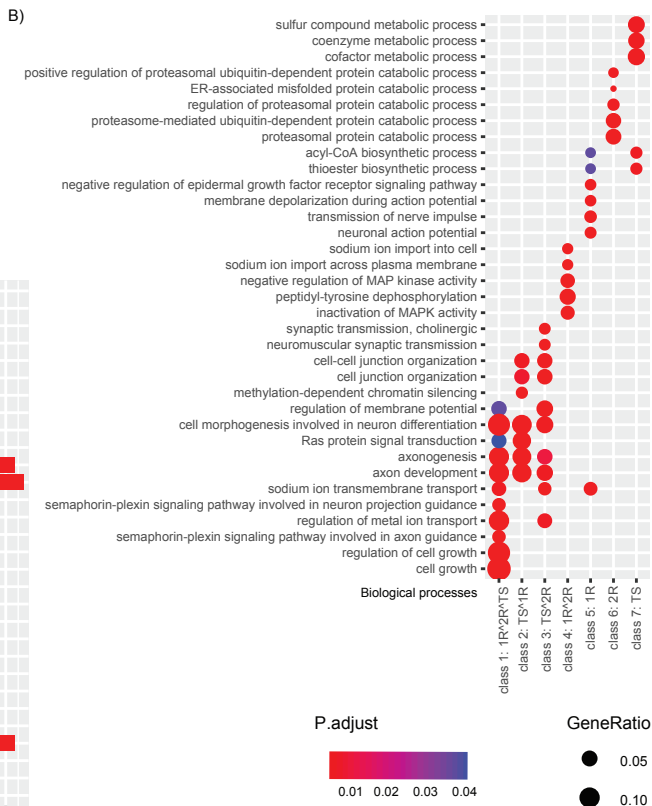

### Biological processes

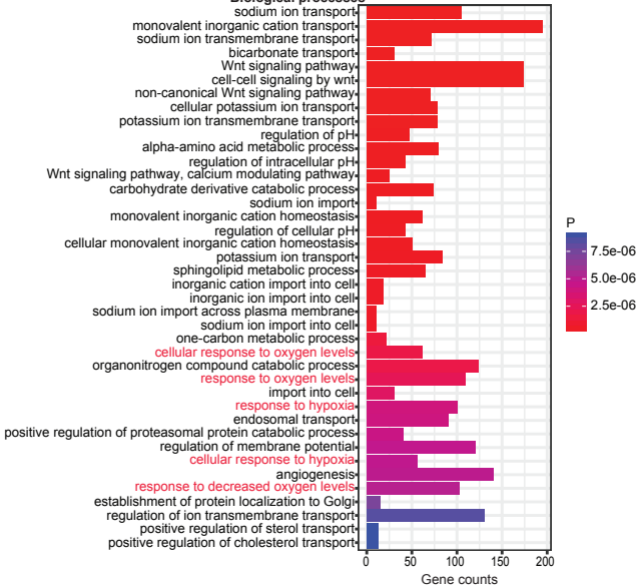

Source: https://www.biorxiv.org/content/10.1101/2020.03.31.017467v1.full.pdf
